# Supplementary material
Source: PubMed Central journal article supplement (PMC420412)

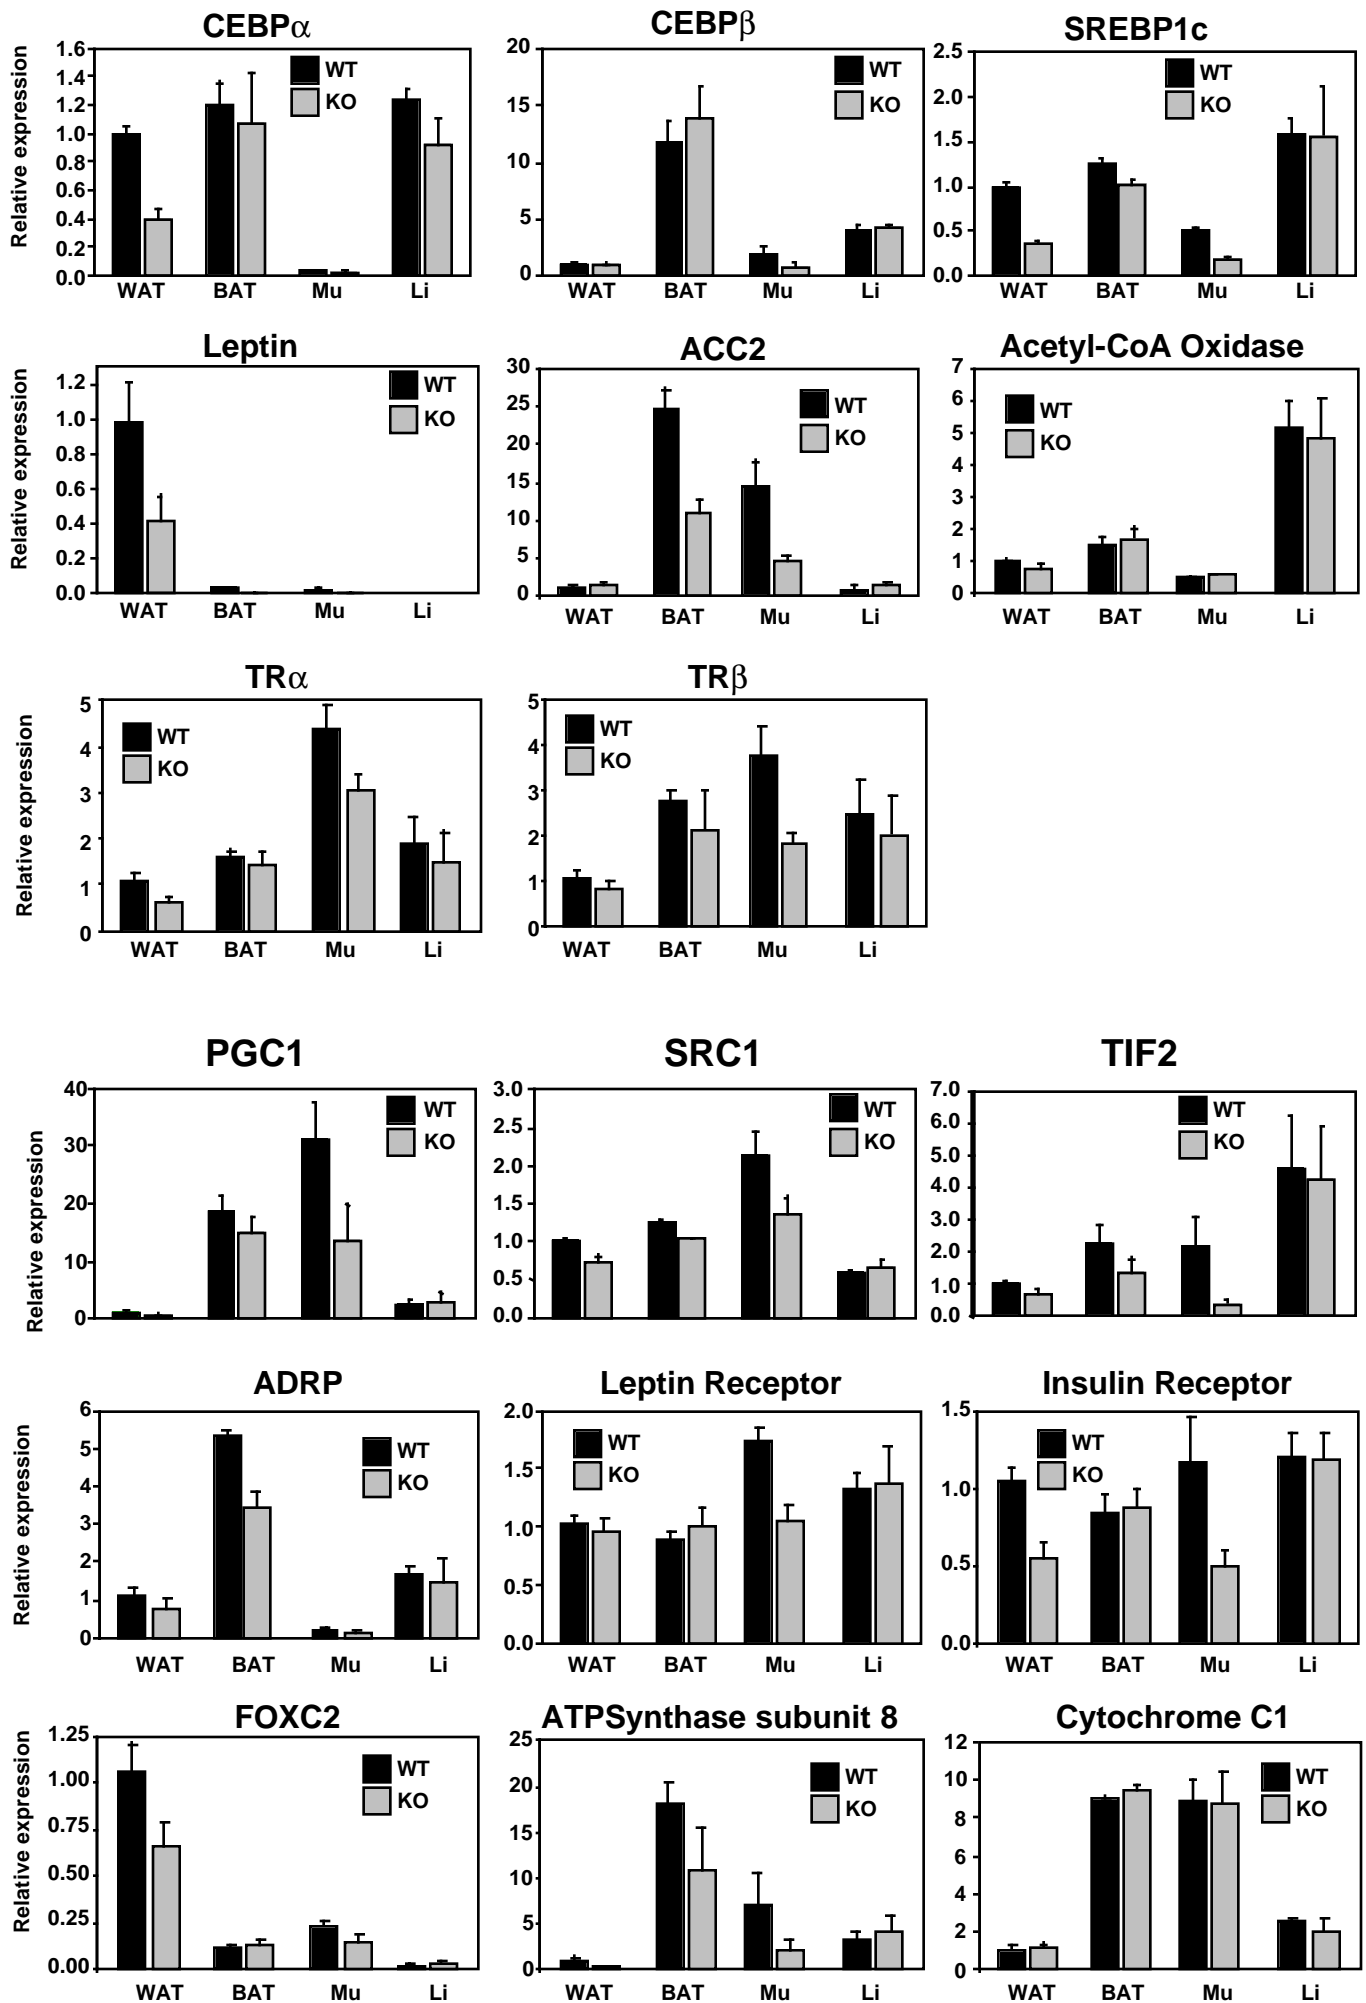

Supplement: pnas_101_22_8437__1.pdf [file pnas_101_22_8437__1.pdf]

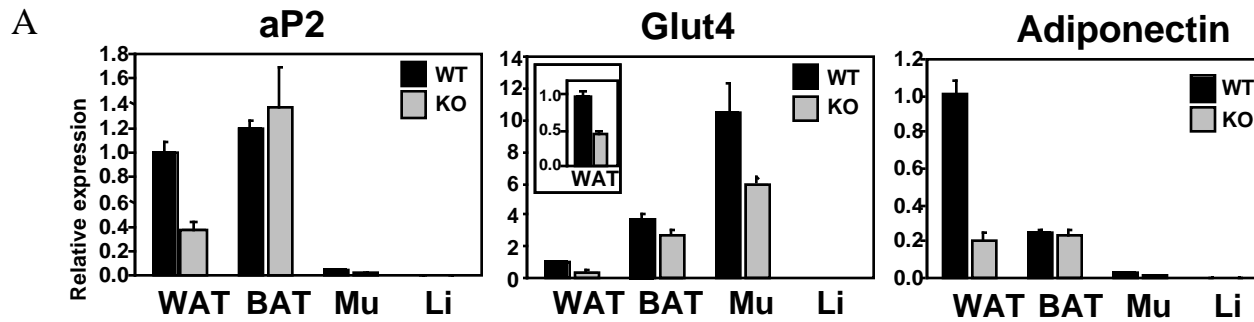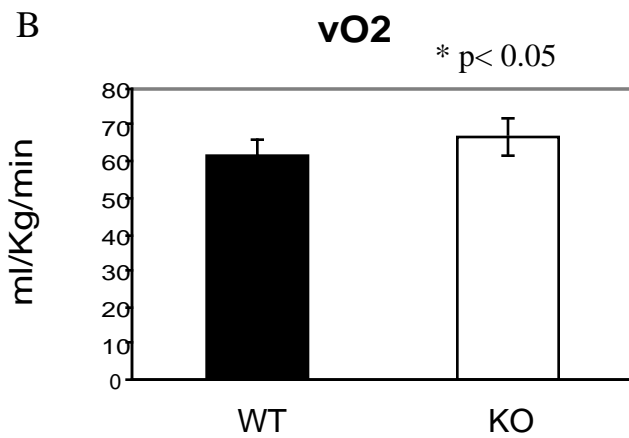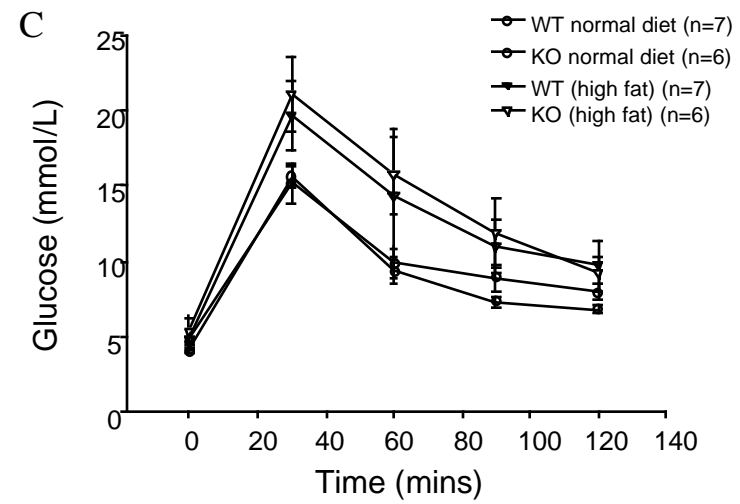

Supplement: pnas_101_22_8437__2.pdf [file pnas_101_22_8437__2.pdf]
